# Supplementary material
Source: PubMed Central journal article supplement (PMC3993896)
Supplement: bm401740x_si_001.pdf [file bm401740x_si_001.pdf]

## Supplementary materials

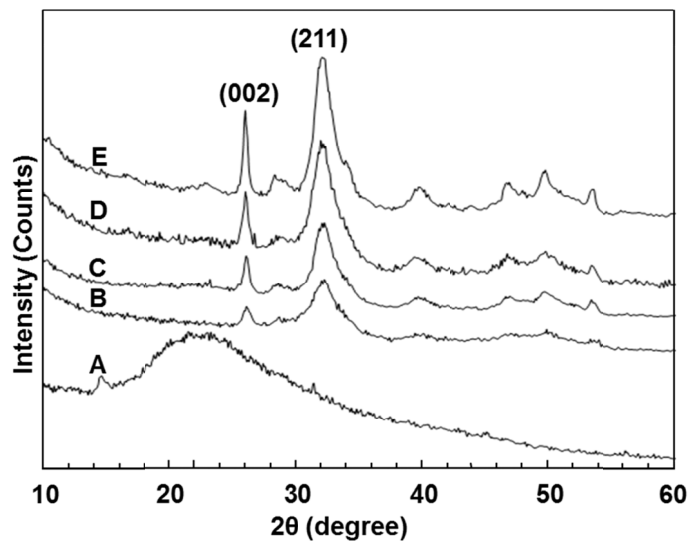

**Figure S1.** XRD patterns of samples: (a) AS; (b) MAS<sub>2</sub>; (c) MAS<sub>6</sub>; (d) MAS<sub>24</sub> and (e) pure HAp powder. XRD patterns show the peak intensities of (002) and (211) of MAS are dramatically enhanced during the increase of the mineralization time.

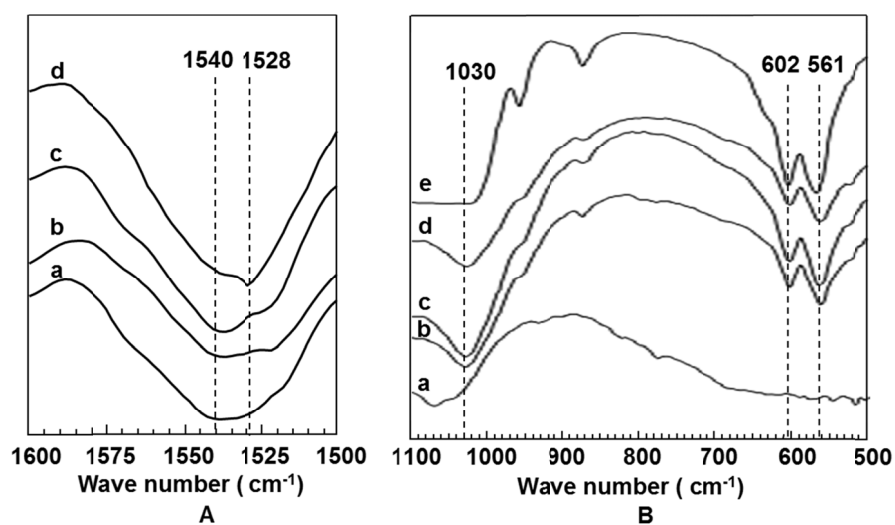

**Figure S2.** FTIR spectra of samples: (A) the region showing AS; (B) the region showing HAp. (a) AS; (b) MAS<sub>2</sub>; (c) MAS<sub>6</sub>; (d) MAS<sub>24</sub> and (e) pure HAp powder. FTIR spectra show the peaks of 561, 602 cm<sup>-1</sup> are corresponding to the O–P–O stretching vibration, and the peak at 1030 cm<sup>-1</sup> is assigned to the P–O stretching vibration of HAp. The amide I shifted from 1540 to 1525 cm<sup>-1</sup> indicated that AS was assembled into  $\beta$ -sheet with nucleation of HAp.

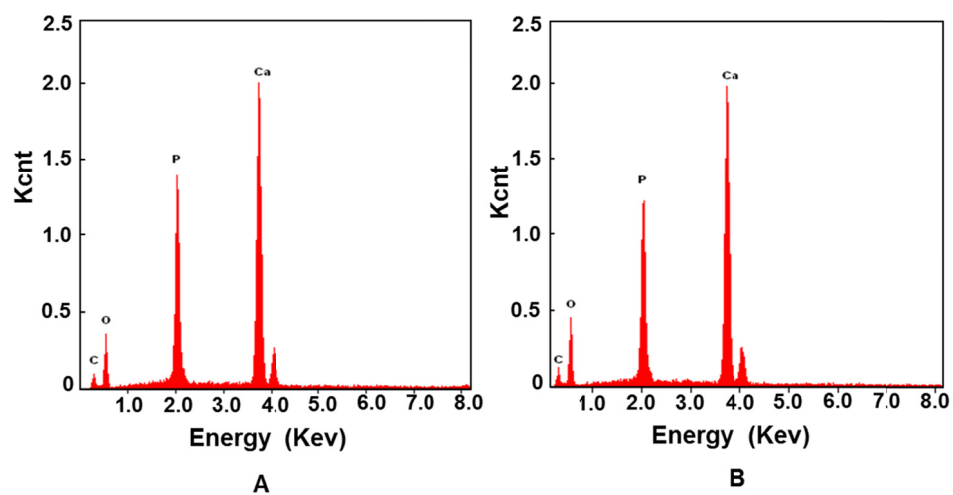

**Figure S3.** EDX spectra of samples: (A) MAS<sub>2</sub> and (B) MAS<sub>24</sub>. EDX spectrum of MAS<sub>2</sub> and MAS<sub>24</sub> showed prominent peaks for P and Ca, the calculated atomic ratios were Ca/P=1.56 (A) and 1.66 (B), respectively.

**Table S1. The amino acid composition analysis of AS**

| <b>Amino acid</b> | <b>AS</b> | <b>Amino acid</b> | <b>AS</b> |
|-------------------|-----------|-------------------|-----------|
| <b>Ala</b>        | 24.25     | <b>Val</b>        | 0.40      |
| <b>Gly</b>        | 38.85     | <b>Leu</b>        | 0.50      |
| <b>Tyr</b>        | 0.89      | <b>Ile</b>        | 0.22      |
| <b>Ser</b>        | 13.00     | <b>Phe</b>        | 7.51      |
| <b>Asp</b>        | 6.69      | <b>Pro</b>        | 0.52      |
| <b>Arg</b>        | 3.17      | <b>Thr</b>        | 0.38      |
| <b>His</b>        | 1.11      | <b>Met</b>        | 0.00      |
| <b>Glu</b>        | 1.22      | <b>Cys</b>        | 0.12      |
| <b>Lys</b>        | 1.15      |                   |           |
